# Supplementary material for: All SNPs Are Not Created Equal: Genome-Wide Association Studies Reveal a Consistent Pattern of Enrichment among Functionally Annotated SNPs
Source: PLoS Genet. 2013 Apr 25;9(4):e1003449. doi: 10.1371/journal.pgen.1003449 (PMC3636284; doi:10.1371/journal.pgen.1003449)
Supplement: Table S6 — Enrichment Scores. Here we present in a table the enrichment values used to create Figure 2 and Figure S6, the normalize mean(z-score2–1). All values are expressed in relative proportions of the highest category for each phenotype. BD, Bipolar Disorder; BMI, Body Mass Index; CD, Crohn's disease; CPD, Cigarettes per Day; DBP, Diastolic blood pressure; HDL, High density lipoprotein; LDL, Low density lipoprotein; SBP, systolic blood pressure; SCZ, Schizophrenia; TC, total Cholesterol; TG, triglycerides; UC, Ulcerative Colitis; WHR, Waist-hip-ratio. (XLSX) [file pgen.1003449.s025.xlsx]

## Sheet: Sheet1
	10kUp	1kUp	5'UTR	Exon	Intron	3'UTR	1kDown	10kDown	Intergenic
BD	0.413	0.576	1	0.549	0.31	0.533	0.535	0.427	0.035
BMI	0.507	0.613	1	0.603	0.317	0.638	0.563	0.406	0.16
CD	0.455	0.702	1	0.642	0.31	0.594	0.627	0.479	0.04
CPD	0.191	0.64	1	0.32	0.012	0.401	0.379	0.291	0.111
DBP	0.567	0.816	1	0.787	0.382	0.731	0.726	0.563	0.018
HDL	0.623	0.9	1	0.866	0.402	0.849	0.946	0.613	0.014
Height	0.478	0.675	1	0.63	0.314	0.624	0.589	0.476	0.044
LDL	0.73	0.941	1	0.957	0.428	0.89	0.924	0.606	0.032
SBP	0.599	0.863	1	0.764	0.433	0.866	0.793	0.583	0.045
SCZ	0.379	0.62	1	0.594	0.237	0.582	0.619	0.396	0.038
TC	0.661	0.925	1	0.865	0.401	0.821	0.901	0.558	0.029
TG	0.536	0.796	1	0.751	0.343	0.876	0.905	0.554	0.02
UC	0.387	0.687	1	0.622	0.242	0.592	0.649	0.42	0.021
WHR	0.477	0.69	1	0.625	0.315	0.63	0.561	0.437	0.047
